# Supplementary material for: Comparison of different assembly and annotation tools on analysis of simulated viral metagenomic communities in the gut
Source: PubMed Central journal article supplement (PMC3901335; doi:10.1186/1471-2164-15-37), 2014-01-18

**A**

PhymmBL Sensitivity and Specificity at Genus Level

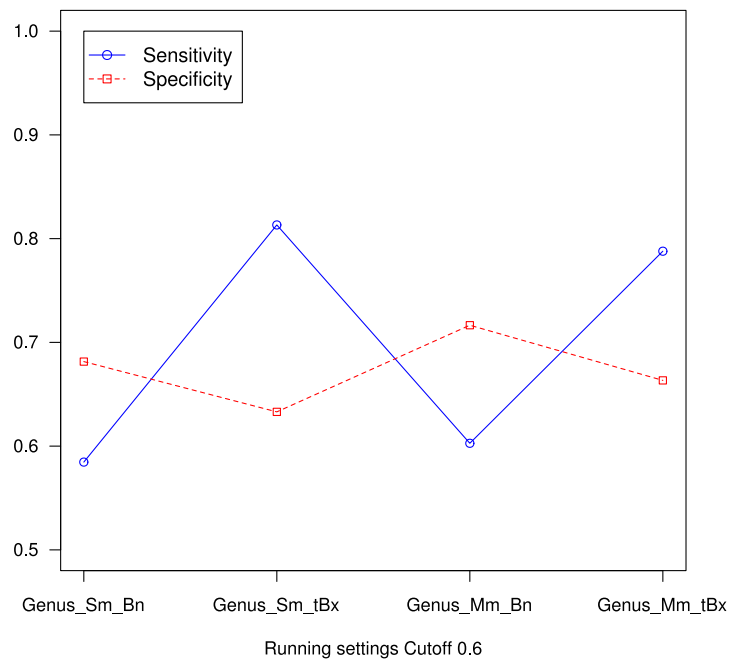**B**

PhymmBL Sensitivity and Specificity at Family Level

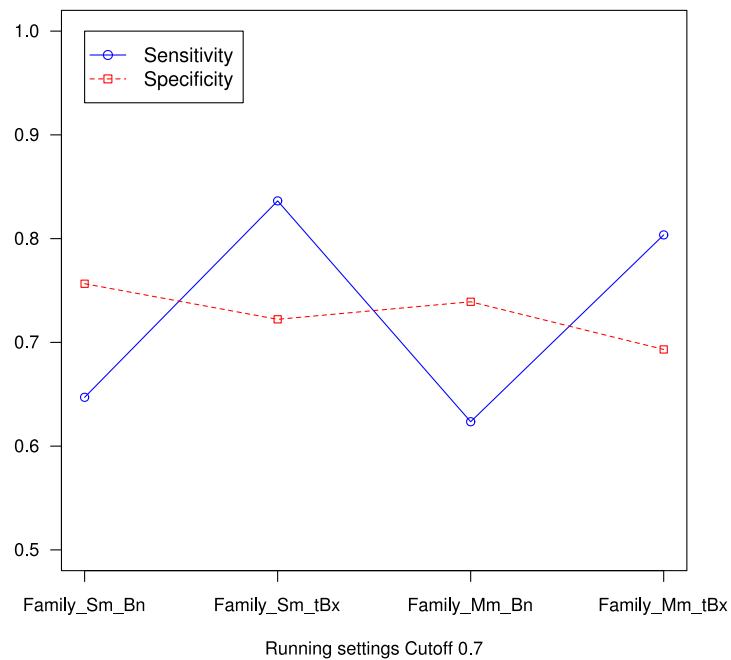**C**

PhymmBL Sensitivity and Specificity at Order Level

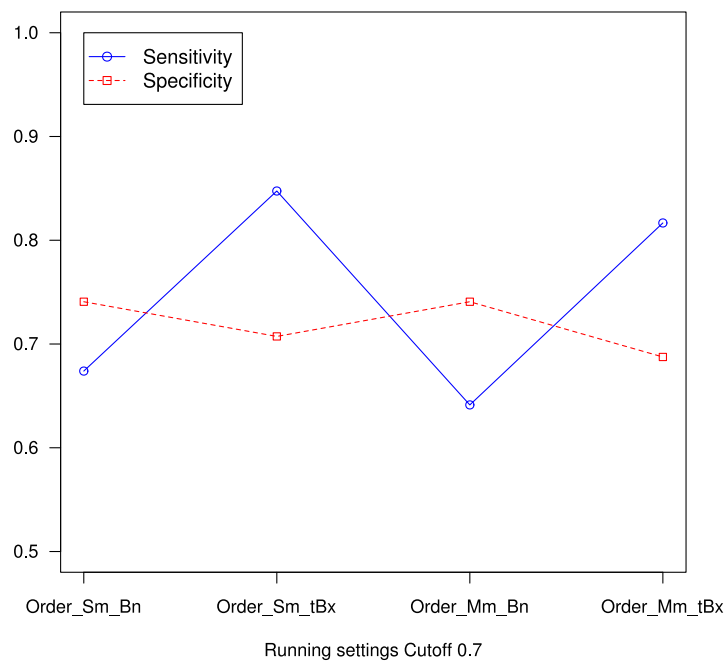

Supplement: 1471-2164-15-37-S6.pdf [file 1471-2164-15-37-S6.pdf]
